# Supplementary material
Source: publisher figshare collection journal article supplement (https://karger.figshare.com/ndownloader/files/26599262)

**Supplemental Figure 2.** Summary assessment of risk of bias for nonrandomized studies using ROBINS-I tool.


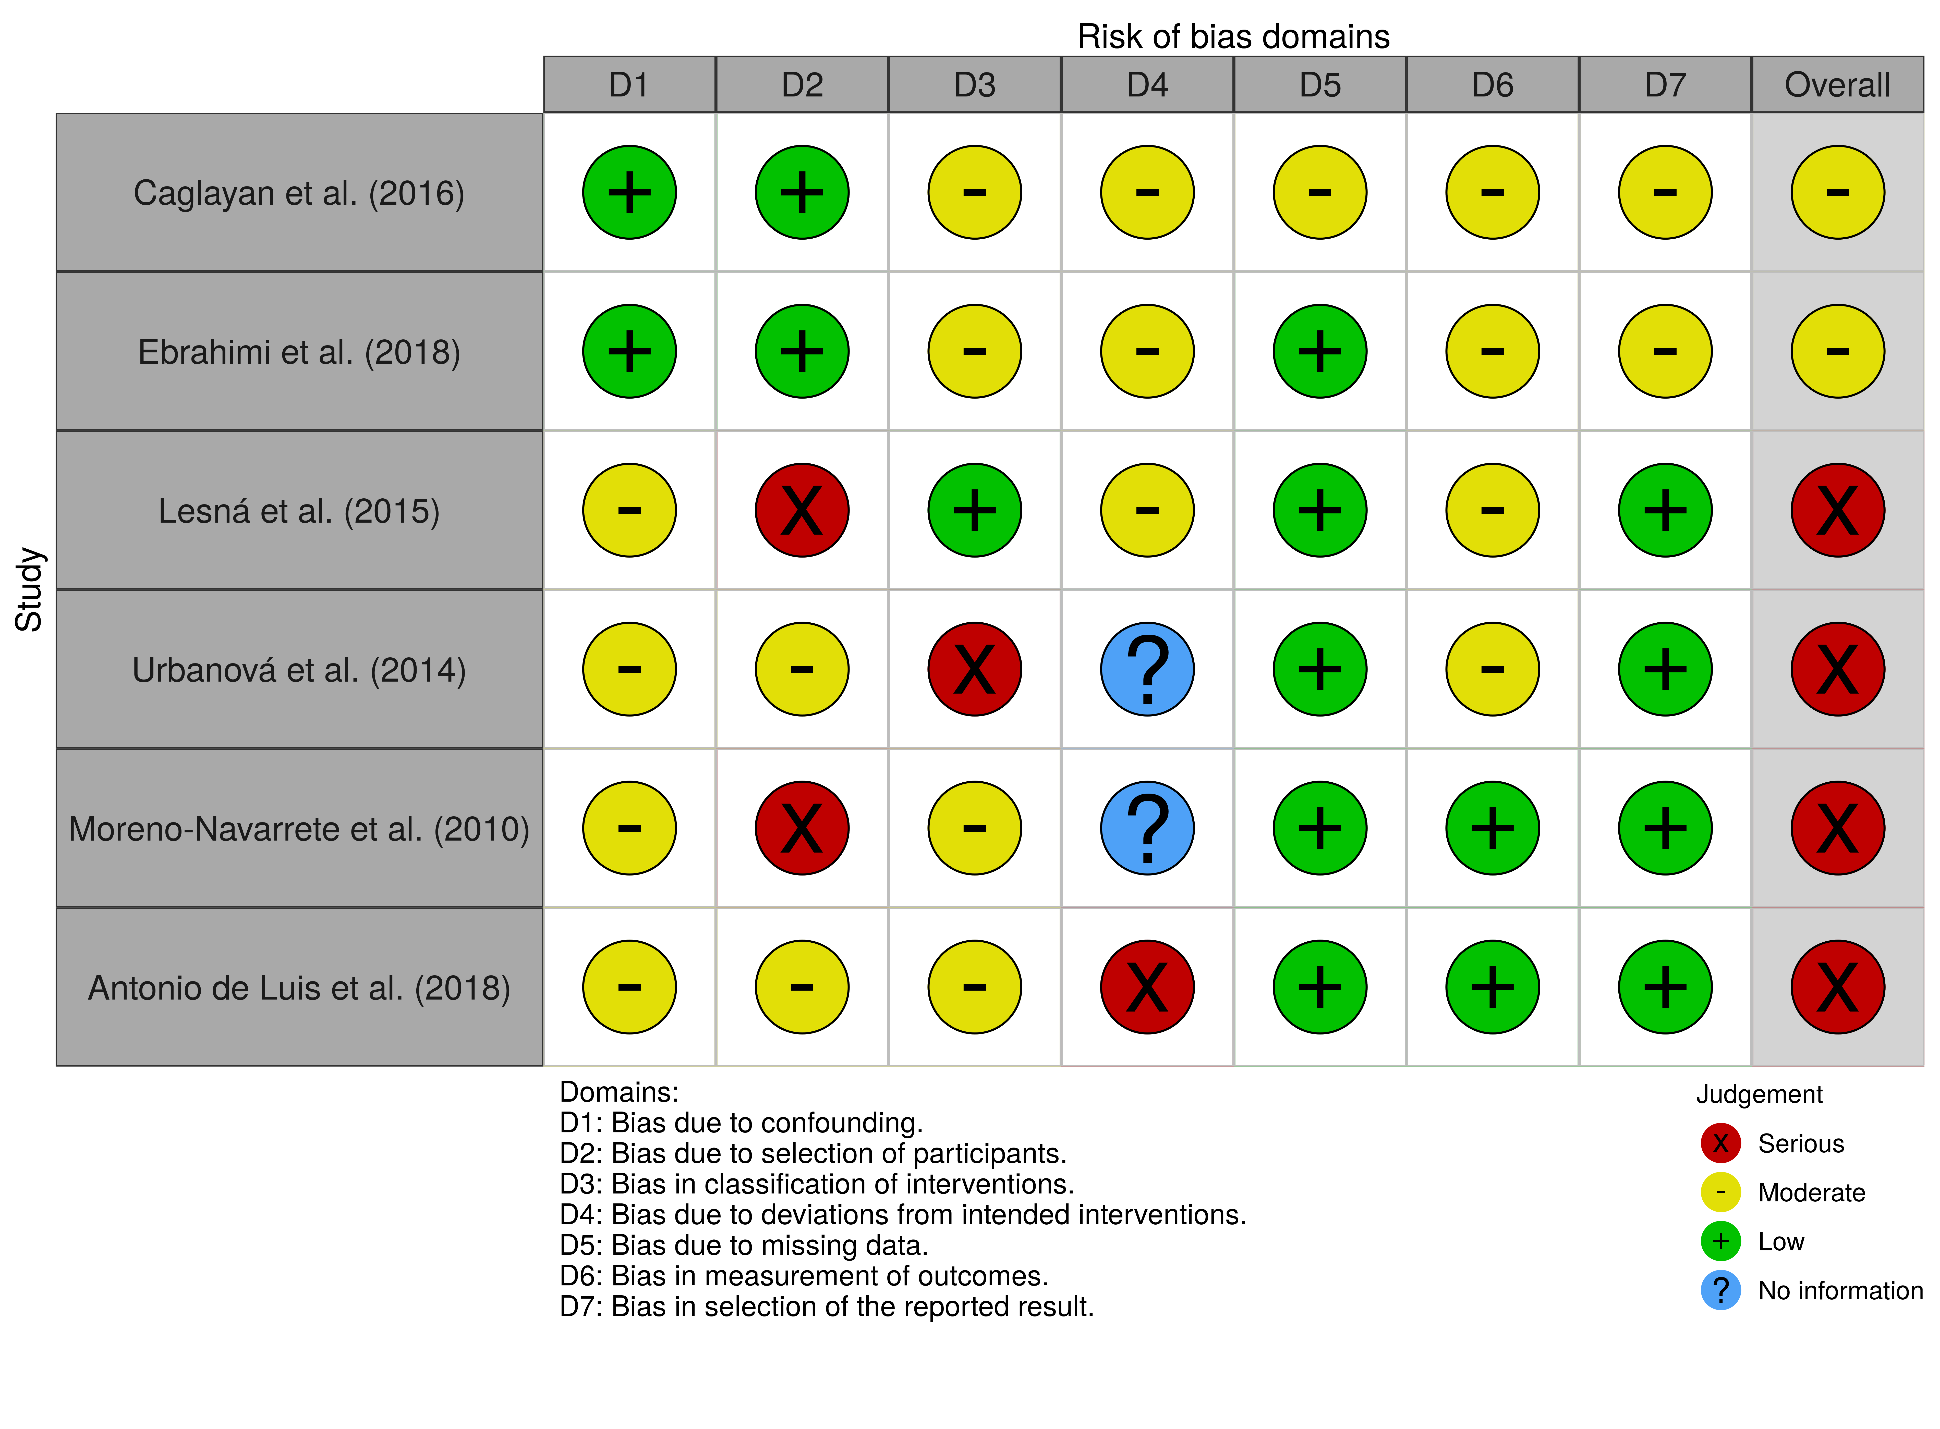

Supplement: Supplementary file 1 [file 26599262]
